# Supplementary material for: Introducing Fluorescence-Guided Surgery for Pediatric Ewing, Osteo-, and Rhabdomyosarcomas: A Literature Review
Source: MDPI journal article supplement (doi:10.3390/biomedicines9101388), 2021-10-04
Supplement: s1 [file s1]

**Table S1.** Published/completed trials with clinically available antibodies for Osteosarcoma-, Rhabdomyosarcoma- and Ewing Sarcoma patients

| Targets  | Tumor type                               | Clinically available antibody (targeted therapy)                               | Age of the study population | Clinical trial phase        | Safety                                        | Literature (PMID/NCT)                                                                                                                                                    |
|----------|------------------------------------------|--------------------------------------------------------------------------------|-----------------------------|-----------------------------|-----------------------------------------------|--------------------------------------------------------------------------------------------------------------------------------------------------------------------------|
| HER2     | Metastatic OS                            | Trastuzumab                                                                    | <32-year-old patients       | Phase 2                     | Safe                                          | 22665540                                                                                                                                                                 |
| gpNMB    | Recurrent OS                             | Glembatumumab vedotin                                                          | 12–31-year-old patients     | Phase 2                     | Safe                                          | 31586757                                                                                                                                                                 |
| VEGF-A   | OS, ES, and RMS                          | Bevacizumab                                                                    | 0.5-29-year-old patients    | Pilot- and phase 2          | Safe (one study reported wound complications) | 28631382, 26461056, 23630159, 31513481, 28738258                                                                                                                         |
| IGF-1R   | OS, ES, and RMS                          | Cixutumumab, Ganitumab, Teprotumumab, Figitumumab, Robatumumab and Dalotuzumab | 1–85-year-old patients      | Pilot-, phase 1 and phase 2 | Safe                                          | 30351457, 22508822, 22025149, 20371689, 22465830, 25446280, 23956055, 22184397, 23477833, 22025154, 27362300, 24797726, 21127194, 23835252, 21750201, 27185573, 20036194 |
| TRAIL-R2 | Recurrent or progressive OS, ES, and RMS | Lexatumumab                                                                    | 2–21-year-old patients      | Phase 1                     | Safe                                          | 23071222                                                                                                                                                                 |
| TEM1     | OS, recurrent or refractory ES and RMS   | Ontuxizumab                                                                    | 3–21-year-old patients      | Phase 1                     | Safe                                          | 29292843                                                                                                                                                                 |

|       |                                     |               |                        |         |                        |             |
|-------|-------------------------------------|---------------|------------------------|---------|------------------------|-------------|
| B7-H3 | Relapsed/refractory OS, ES, and RMS | Enoblituzumab | 1–35-year-old patients | Phase 1 | No statement on safety | NCT02982941 |
|-------|-------------------------------------|---------------|------------------------|---------|------------------------|-------------|

**Table S2.** Ongoing/unpublished trials with clinically available antibodies for Osteosarcoma-, Rhabdomyosarcoma- and Ewing Sarcoma patients

| Targets       | Tumor type                 | Clinically available antibody (targeted therapy)               | Age of the study population | Clinical trial phase         | Status                                                     | NCT-number                                                   |
|---------------|----------------------------|----------------------------------------------------------------|-----------------------------|------------------------------|------------------------------------------------------------|--------------------------------------------------------------|
| GD2           | OS                         | Hu3F8-BsAb (humanized 3F8 bispecific antibody) and Dinutuximab | 1–40-year-old patients      | Phase 1 and phase 2          | Recruiting<br>Active, not recruiting<br>Not yet recruiting | NCT02502786 and<br>NCT03860207<br>NCT02484443<br>NCT04751383 |
| HER2          | OS                         | Trastuzumab Deruxtecan (ADC)                                   | 12 – 39-year-old patients   | Phase 2                      | Recruiting                                                 | NCT04616560                                                  |
| PD-L1         | OS                         | ZKAB001, Avelumab and Durvalimab                               | 12–55-year-old patients     | Phase 1, phase 2 and phase 3 | Recruiting<br>Active, not recruiting<br>Not yet recruiting | NCT03676985 and<br>NCT04668300<br>NCT03006848<br>NCT04359550 |
| CD47 and GD2  | OS                         | Magrolimab + Dinutuximab                                       | 1–35-year-old patients      | 1                            | Not yet recruiting                                         | NCT04751383                                                  |
| semaphorin 4D | Recurrent or refractory OS | Pepinemab                                                      | 1–30-year-old patients      | 1-2                          | Active, not recruiting                                     | NCT03320330                                                  |

|        |                                      |                              |                        |                  |                        |             |
|--------|--------------------------------------|------------------------------|------------------------|------------------|------------------------|-------------|
| AXL    | OS and ES                            | CAB-ANTI-AXL-ADC             | > 17-year-old patients | 1-2              | Recruiting             | NCT03425279 |
| IGF-1R | ES, Embryonal<br>and Alveolar<br>RMS | Ganitumab                    | > 1-year-old patients  | Phase 1, phase 2 | Recruiting             | NCT03041701 |
|        |                                      |                              | < 51-year-old patients | and phase 3      | Active, not recruiting | NCT02306161 |
| CD56   | RMS                                  | Lorvotuzumab Mertansin (ADC) | 1–30-year-old patients | 2                | Active, not recruiting | NCT02452554 |
